# Supplementary material for: Conformal coating of TiO2 nanorods on a 3-D CNT scaffold by using a CNT film as a nanoreactor: a free-standing and binder-free Li-ion anode
Source: Royal Society of Chemistry journal article supplement (doi:10.1039/c3ta14120a), 2013-11-25
Supplement: c3ta14120a.pdf [file c3ta14120a.pdf]

## Supporting information:

Figure S1

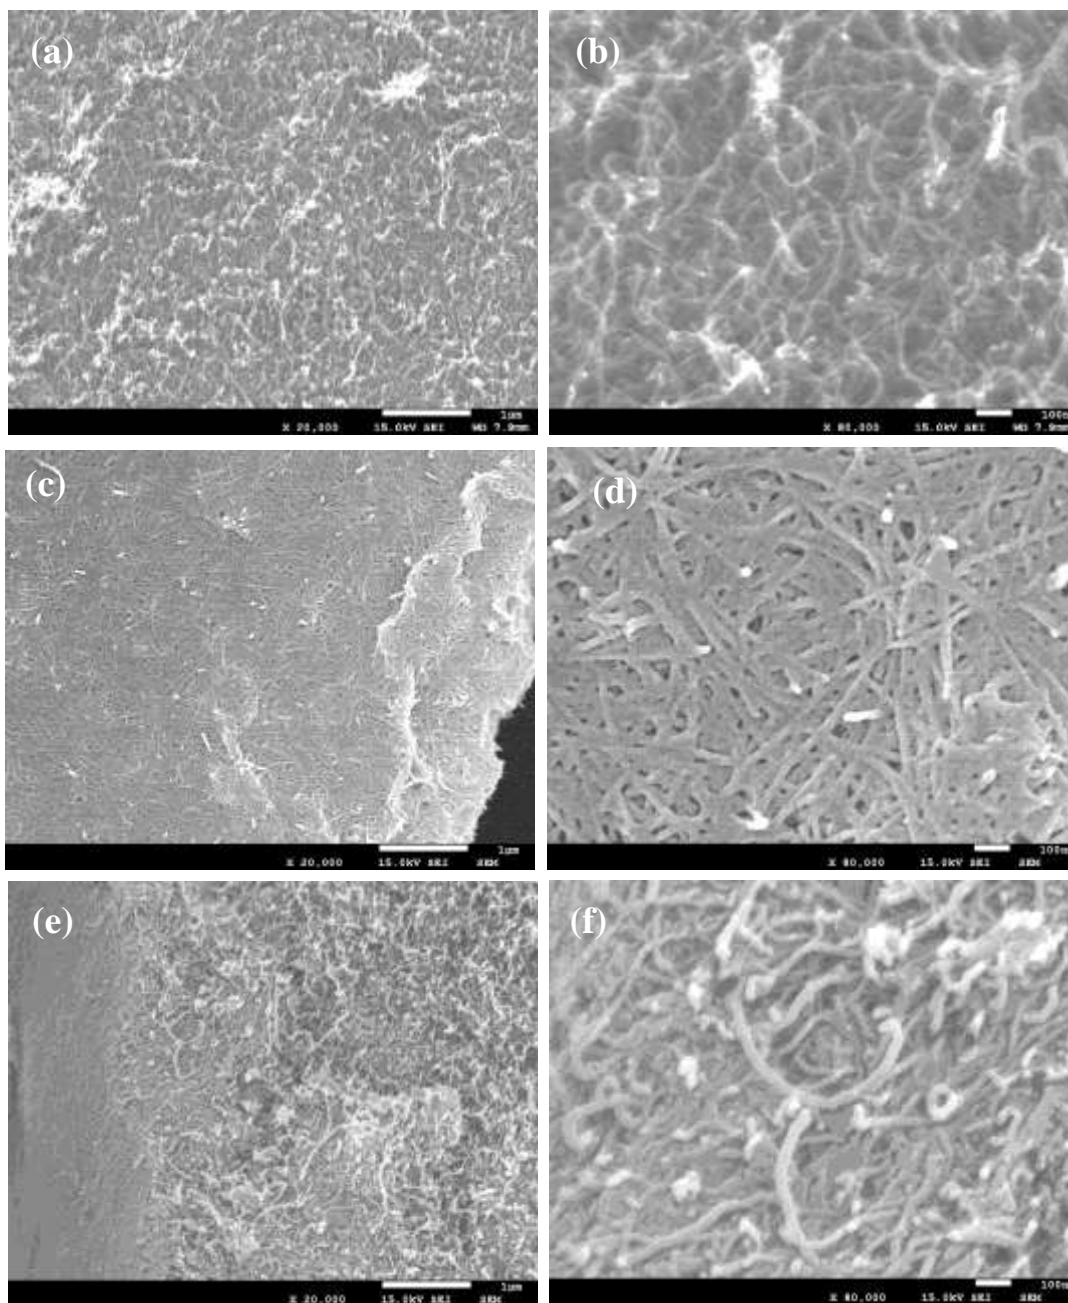

Figure S1 SEM images with different magnifications: The top view of pure CNT film (a,b) and conformal CNT-TiO<sub>2</sub> film (c,d); The cross-section view of conformal CNT-TiO<sub>2</sub> film (e,f).

Figure S2

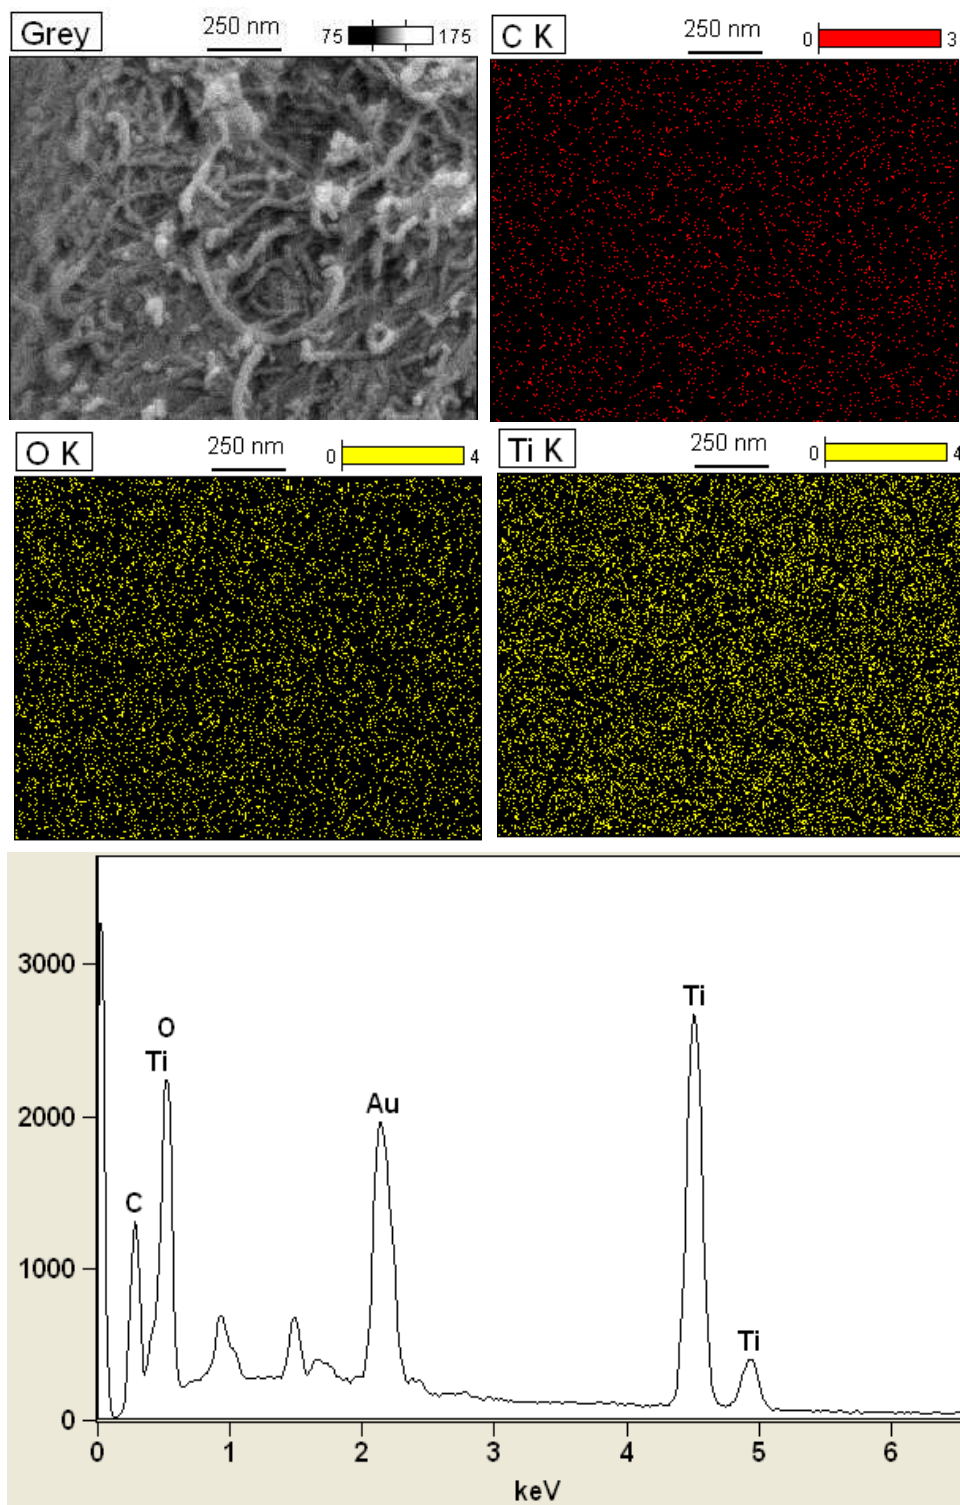

Figure S2 EDS maps of Ti, O and C elements from cross-section view (The Au is from sputter coating).

Figure S3

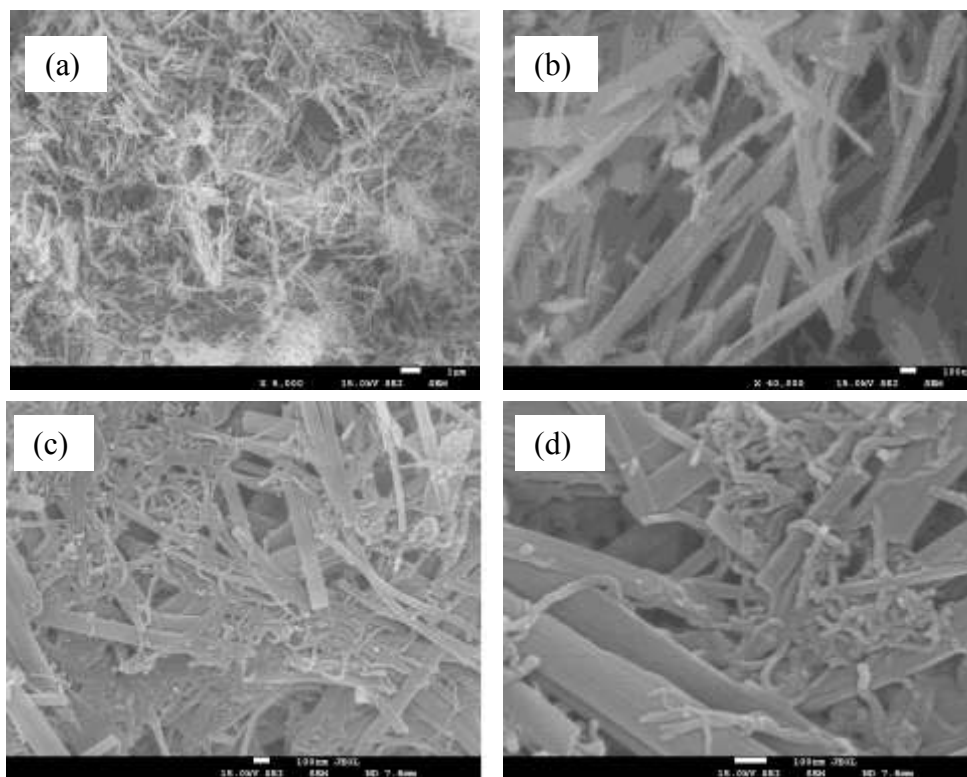

Figure S3 (a,b)TiO<sub>2</sub> nanofibers were synthesized by hydrothermal treatment of TiO<sub>2</sub> particles in 10M NaOH solution; (c,d) TiO<sub>2</sub> nanofiber/CNT composite was synthesized by hydrothermal treatment of TiO<sub>2</sub> and CNTs in 10M NaOH solution (both TiO<sub>2</sub> and CNTs were dispersed in 10M NaOH solution under ultrasonication).

During the hydrothermal treatment of TiO<sub>2</sub> in 10M NaOH solution, TiO<sub>2</sub> particles dissolve in the NaOH solution, which breaks the Ti-O-Ti bonds. The resulting Ti-containing complex precipitates in the strong alkaline environment and bonds to form lamellar sheets and then completely transforms to nanorods/nanofibers.<sup>1</sup> Consistent with the reported results, TiO<sub>2</sub> nanofibers were synthesized by hydrothermal treatment of TiO<sub>2</sub> in 10M NaOH solution, shown in Figure S3a-b. By the addition of CNTs in 10M NaOH solution, a part of the resulting Ti-containing complex precipitates on the CNTs surface;

while, most of the Ti-containing complex prone to self-nucleate, leading to form nanorods/nanofibers, shown in Figure S3c-d.

However, in the CNT/TiO<sub>2</sub> mixed film, the TiO<sub>2</sub> particles are confined in the CNT network, self-nucleation of the Ti-containing complex is greatly suppressed, which results in most of the Ti-containing complex to coat on the CNT networks. So, the 3-D CNT film acts as a nanoreactor to confine the chemical reactions in its network and the interconnected cross-stacking CNT backbone also works as nucleation sites for the new growing of Ti-containing complex.

[1] S. T. Myung, N. Takahashi, S. Komaba, C. S. Yoon, Y. K. Sun, K. Amine, H. Yashiro, *Adv Funct Mater* 2011, 21, 3231.

Figure S4

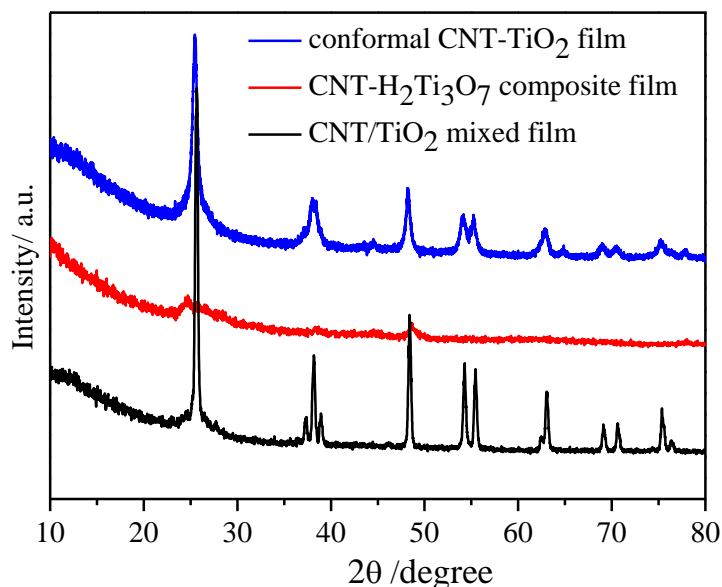

Figure S4 XRD patterns of the CNT/TiO<sub>2</sub> mixed film (precursor), CNT-H<sub>2</sub>Ti<sub>3</sub>O<sub>7</sub> composite film (intermediate product) and conformal CNT-TiO<sub>2</sub> film (final product).

As shown in Figure S4, anatase TiO<sub>2</sub> changed to hydrogen titanate, H<sub>2</sub>Ti<sub>3</sub>O<sub>7</sub> after the hydrothermal treatment and the following ion exchange in HCl (Figure S4 in red), which is in good agreement with the reported result.<sup>1</sup> Then, the heat treatment makes the

$\text{H}_2\text{Ti}_3\text{O}_7$  transferred to anatase  $\text{TiO}_2$ , forming CNT- $\text{TiO}_2$  film (Figure S4 in blue). The diffraction peaks of the  $\text{TiO}_2$  in the conformal CNT- $\text{TiO}_2$  film greatly broaden as compared with that of the  $\text{TiO}_2$  precursor, indicating smaller crystal size. The change of the crystal size further proves that the dissolving and recrystallization of  $\text{TiO}_2$  particles do occur in our system.

Figure S5

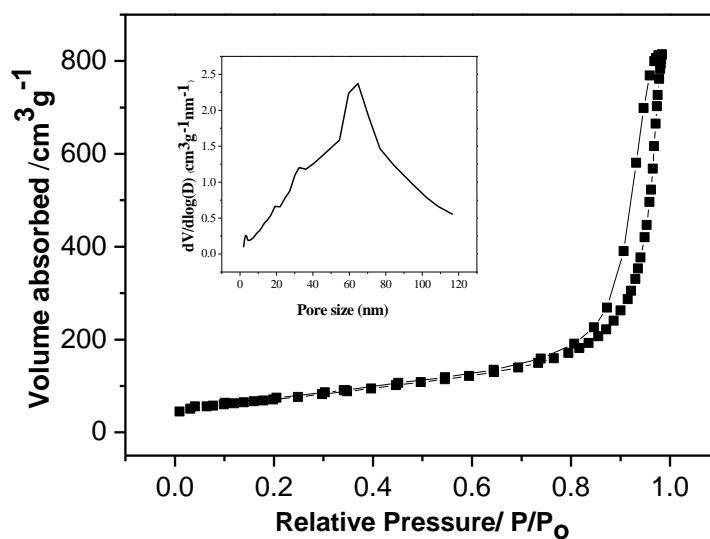

Figure S5 Nitrogen adsorption and desorption isotherm of the conformal CNT- $\text{TiO}_2$  film (the inset is the pore size distribution).

Figure S6

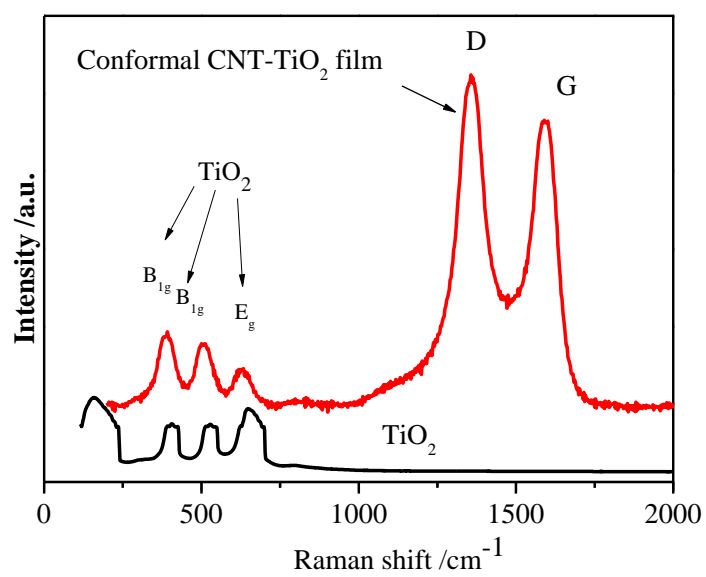

Figure S6 Raman spectra of the conformal CNT-TiO<sub>2</sub> film and the precursor TiO<sub>2</sub> particle.

Figure S7

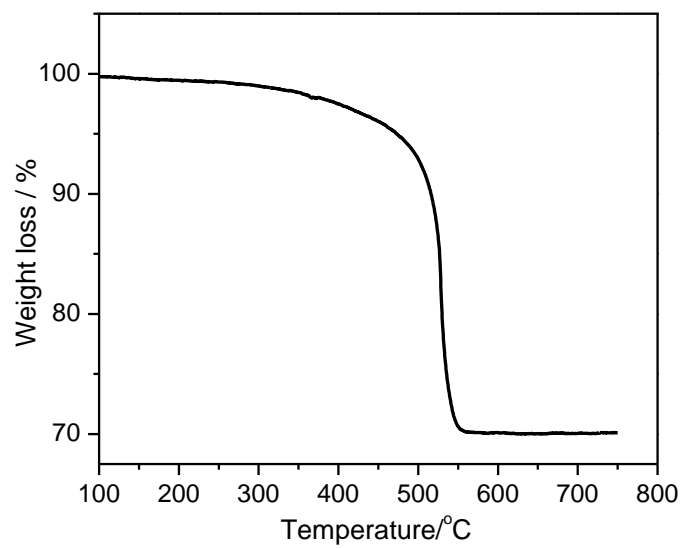

Figure S7 Thermogravimetric analysis of conformal CNT-TiO<sub>2</sub> film

Figure S8

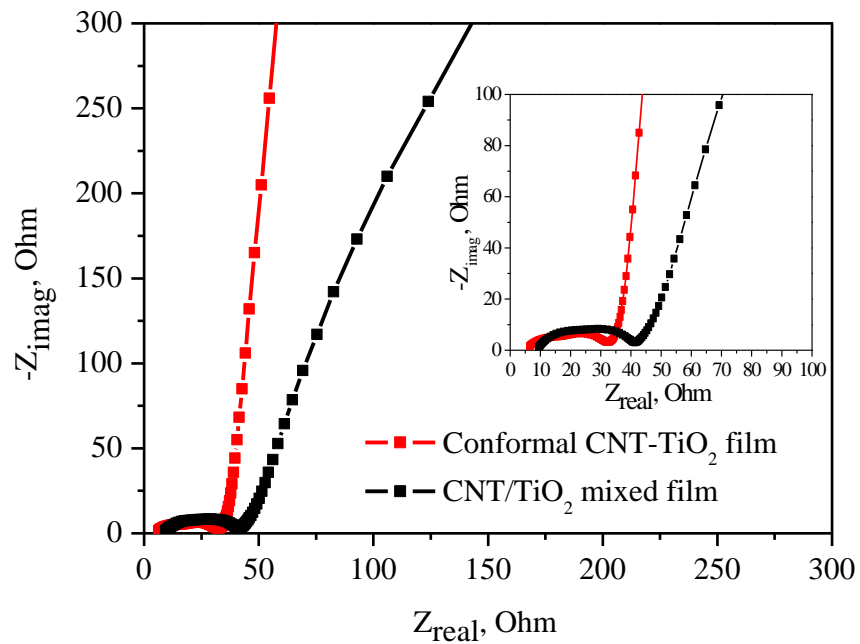

Figure S8 Nyquist plots of conformal CNT-TiO<sub>2</sub> film and CNT/TiO<sub>2</sub> mixed film electrodes after rate cycling test.



Figure S9

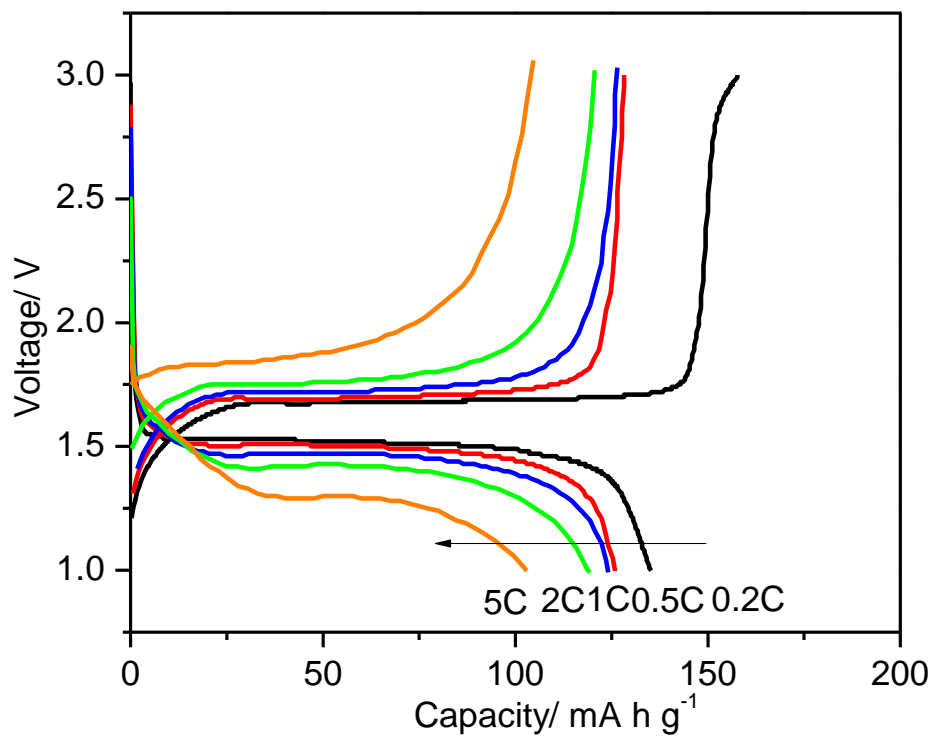

Figure S9 Charge-discharge voltage profiles of CNT-TiO<sub>2</sub>/ LiFePO<sub>4</sub> full cell at different rates.

Figure S10

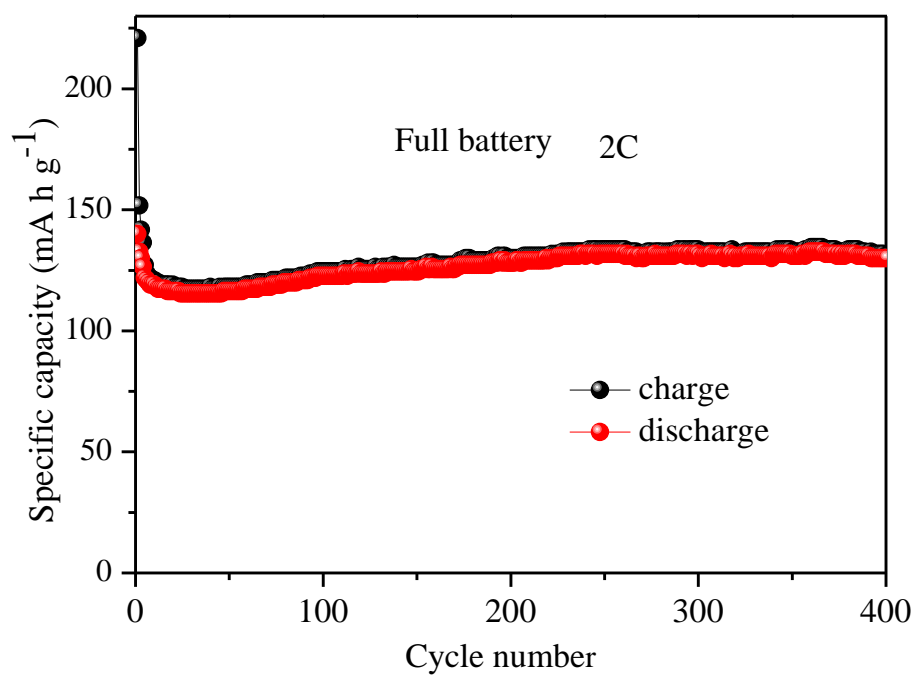

Figure S10 Cycling performance of CNT-TiO<sub>2</sub>/ LiFePO<sub>4</sub> full cell at a rate of 2C in a voltage range of 1-3 V.

1. S. T. Myung, N. Takahashi, S. Komaba, C. S. Yoon, Y. K. Sun, K. Amine and H. Yashiro, *Adv Funct Mater*, 2011, **21**, 3231-3241.
